# Supplementary material for: Learning to estimate the fiber orientation distribution function from diffusion-weighted MRI
Source: PubMed Central journal article supplement — Neuroimage. Author manuscript; Available in PMC 2021 Oct 1. (PMC8385546; doi:10.1016/j.neuroimage.2021.118316), 2021-06-26
Supplement: NIHMS1732377-supplement-1.pdf [file NIHMS1732377-supplement-1.pdf]

# Supplementary Materials

## Learning to Estimate the Fiber Orientation Distribution Function from Diffusion-Weighted MRI

Paper No. NIMG-20-2928

Davood Karimi, Lana Vasung, Camilo Jaimes, Fedel Machado-Rivas, Simon K. Warfield, Ali Gholipour

### 1 Detailed expert tractography scores

Tables S1 to S3 below show the detailed scores assigned by the three experts to 8 different tracts on the tractograms from 17 test subjects from the dHCP dataset.

| Subject No. | Method   | CNG | IFOF | UF | FF | CST | AC | FST | MCP | total |
|-------------|----------|-----|------|----|----|-----|----|-----|-----|-------|
| Subject 1   | Proposed | 3   | 2    | 2  | 3  | 3   | 3  | 3   | 3   | 22    |
|             | SFM      | 2   | 1    | 1  | 1  | 3   | 2  | 2   | 3   | 15    |
| Subject 2   | Proposed | 3   | 3    | 3  | 3  | 3   | 2  | 3   | 3   | 23    |
|             | SFM      | 2   | 1    | 2  | 1  | 2   | 2  | 2   | 3   | 15    |
| Subject 3   | Proposed | 2   | 3    | 3  | 3  | 3   | 3  | 3   | 3   | 23    |
|             | SFM      | 1   | 2    | 2  | 2  | 3   | 2  | 2   | 2   | 16    |
| Subject 4   | Proposed | 3   | 3    | 3  | 3  | 3   | 3  | 3   | 2   | 23    |
|             | SFM      | 2   | 2    | 1  | 2  | 2   | 2  | 3   | 1   | 15    |
| Subject 5   | Proposed | 3   | 3    | 1  | 3  | 3   | 3  | 3   | 3   | 22    |
|             | SFM      | 1   | 2    | 1  | 2  | 1   | 3  | 1   | 1   | 12    |
| Subject 6   | Proposed | 3   | 3    | 2  | 3  | 3   | 3  | 3   | 3   | 23    |
|             | SFM      | 1   | 1    | 2  | 2  | 2   | 2  | 2   | 3   | 15    |
| Subject 7   | Proposed | 3   | 3    | 2  | 2  | 3   | 3  | 3   | 2   | 21    |
|             | SFM      | 2   | 1    | 1  | 1  | 2   | 3  | 3   | 1   | 14    |
| Subject 8   | Proposed | 3   | 3    | 2  | 2  | 2   | 3  | 3   | 3   | 21    |
|             | SFM      | 2   | 1    | 1  | 1  | 2   | 3  | 2   | 2   | 14    |
| Subject 9   | Proposed | 3   | 3    | 2  | 3  | 3   | 3  | 3   | 3   | 23    |
|             | SFM      | 3   | 2    | 1  | 1  | 2   | 2  | 2   | 2   | 15    |
| Subject 10  | Proposed | 2   | 2    | 1  | 1  | 3   | 2  | 3   | 2   | 16    |
|             | SFM      | 1   | 1    | 1  | 2  | 3   | 2  | 2   | 2   | 14    |
| Subject 11  | Proposed | 2   | 3    | 2  | 2  | 2   | 2  | 3   | 2   | 18    |
|             | SFM      | 1   | 2    | 1  | 1  | 2   | 2  | 3   | 1   | 13    |
| Subject 12  | Proposed | 3   | 3    | 3  | 3  | 3   | 2  | 3   | 3   | 23    |
|             | SFM      | 3   | 3    | 2  | 2  | 3   | 2  | 2   | 2   | 19    |
| Subject 13  | Proposed | 1   | 3    | 3  | 2  | 2   | 3  | 3   | 3   | 20    |
|             | SFM      | 2   | 3    | 3  | 1  | 2   | 3  | 3   | 2   | 19    |
| Subject 14  | Proposed | 3   | 3    | 1  | 3  | 1   | 2  | 3   | 2   | 18    |
|             | SFM      | 3   | 1    | 1  | 2  | 2   | 1  | 2   | 1   | 13    |
| Subject 15  | Proposed | 3   | 3    | 1  | 2  | 2   | 3  | 3   | 3   | 20    |
|             | SFM      | 2   | 2    | 1  | 3  | 2   | 3  | 3   | 2   | 18    |
| Subject 16  | Proposed | 3   | 3    | 3  | 3  | 3   | 3  | 3   | 2   | 23    |
|             | SFM      | 3   | 2    | 2  | 3  | 3   | 3  | 3   | 1   | 20    |
| Subject 17  | Proposed | 3   | 3    | 3  | 3  | 3   | 3  | 3   | 3   | 24    |
|             | SFM      | 2   | 3    | 3  | 2  | 2   | 2  | 2   | 2   | 18    |

Table S1: Detailed scores from Expert 1.

CNG: Cingulum, IFOF: Inferior fronto-occipital fasciculus, UF: Uncinate fasciculus, FF: Frontopontine fibers, CST: Corticospinal tract, AC: Anterior Commissure, FST: Fornix and striae terminalis, MCP: Middle Cerebellar Peduncles, total: sum of the scores for the eight tracts.

| Subject No. | Method   | CNG | IFOF | UF | FF | CST | AC | FST | MCP | total |
|-------------|----------|-----|------|----|----|-----|----|-----|-----|-------|
| Subject 1   | Proposed | 3   | 3    | 3  | 3  | 3   | 3  | 3   | 3   | 24    |
|             | SFM      | 2   | 2    | 2  | 1  | 2   | 2  | 2   | 2   | 15    |
| Subject 2   | Proposed | 3   | 2    | 2  | 2  | 3   | 2  | 3   | 3   | 20    |
|             | SFM      | 2   | 1    | 1  | 1  | 2   | 2  | 2   | 3   | 14    |
| Subject 3   | Proposed | 3   | 3    | 3  | 3  | 3   | 3  | 3   | 3   | 24    |
|             | SFM      | 2   | 2    | 2  | 2  | 2   | 2  | 2   | 2   | 16    |
| Subject 4   | Proposed | 3   | 3    | 3  | 3  | 3   | 3  | 3   | 3   | 24    |
|             | SFM      | 2   | 2    | 2  | 2  | 2   | 2  | 2   | 2   | 16    |
| Subject 5   | Proposed | 3   | 3    | 2  | 3  | 2   | 3  | 3   | 3   | 22    |
|             | SFM      | 2   | 2    | 2  | 1  | 2   | 3  | 2   | 2   | 16    |
| Subject 6   | Proposed | 3   | 3    | 2  | 3  | 3   | 3  | 3   | 3   | 23    |
|             | SFM      | 2   | 2    | 2  | 2  | 2   | 2  | 2   | 2   | 16    |
| Subject 7   | Proposed | 3   | 3    | 2  | 2  | 2   | 3  | 3   | 2   | 20    |
|             | SFM      | 2   | 2    | 2  | 1  | 2   | 2  | 2   | 1   | 14    |
| Subject 8   | Proposed | 3   | 3    | 3  | 2  | 3   | 2  | 3   | 3   | 22    |
|             | SFM      | 2   | 1    | 1  | 1  | 2   | 2  | 2   | 2   | 13    |
| Subject 9   | Proposed | 3   | 2    | 3  | 3  | 3   | 3  | 3   | 3   | 23    |
|             | SFM      | 3   | 1    | 2  | 1  | 2   | 2  | 2   | 2   | 15    |
| Subject 10  | Proposed | 3   | 3    | 1  | 2  | 3   | 2  | 3   | 2   | 19    |
|             | SFM      | 2   | 2    | 1  | 1  | 2   | 2  | 2   | 2   | 14    |
| Subject 11  | Proposed | 3   | 3    | 3  | 2  | 3   | 2  | 3   | 3   | 22    |
|             | SFM      | 2   | 2    | 1  | 2  | 2   | 2  | 3   | 2   | 16    |
| Subject 12  | Proposed | 3   | 3    | 3  | 2  | 3   | 2  | 3   | 2   | 21    |
|             | SFM      | 2   | 2    | 2  | 2  | 3   | 2  | 2   | 2   | 17    |
| Subject 13  | Proposed | 2   | 2    | 3  | 2  | 2   | 2  | 3   | 3   | 19    |
|             | SFM      | 2   | 2    | 2  | 2  | 2   | 2  | 3   | 2   | 17    |
| Subject 14  | Proposed | 3   | 3    | 2  | 3  | 3   | 3  | 3   | 3   | 23    |
|             | SFM      | 2   | 2    | 2  | 2  | 2   | 2  | 2   | 2   | 16    |
| Subject 15  | Proposed | 3   | 3    | 2  | 3  | 3   | 3  | 3   | 3   | 23    |
|             | SFM      | 2   | 2    | 2  | 2  | 2   | 2  | 3   | 2   | 17    |
| Subject 16  | Proposed | 3   | 3    | 3  | 3  | 3   | 3  | 3   | 3   | 24    |
|             | SFM      | 2   | 2    | 2  | 2  | 2   | 2  | 2   | 2   | 16    |
| Subject 17  | Proposed | 3   | 3    | 2  | 3  | 3   | 3  | 3   | 3   | 23    |
|             | SFM      | 2   | 2    | 3  | 2  | 2   | 2  | 2   | 2   | 17    |

Table S2: Detailed scores from Expert 2.

CNG: Cingulum, IFOF: Inferior fronto-occipital fasciculus, UF: Uncinate fasciculus, FF: Frontopontine fibers, CST: Corticospinal tract, AC: Anterior Commissure, FST: Fornix and striae terminalis, MCP: Middle Cerebellar Peduncles, total: sum of the scores for the eight tracts.

| Subject No. | Method   | CNG | IFOF | UF | FF | CST | AC | FST | MCP | total |
|-------------|----------|-----|------|----|----|-----|----|-----|-----|-------|
| Subject 1   | Proposed | 3   | 3    | 3  | 3  | 3   | 3  | 3   | 3   | 24    |
|             | SFM      | 2   | 2    | 2  | 1  | 2   | 2  | 2   | 2   | 15    |
| Subject 2   | Proposed | 3   | 2    | 2  | 2  | 3   | 2  | 3   | 3   | 20    |
|             | SFM      | 2   | 1    | 1  | 1  | 2   | 2  | 2   | 3   | 14    |
| Subject 3   | Proposed | 3   | 3    | 3  | 3  | 3   | 3  | 3   | 3   | 24    |
|             | SFM      | 2   | 2    | 2  | 2  | 2   | 2  | 2   | 2   | 16    |
| Subject 4   | Proposed | 3   | 3    | 3  | 3  | 3   | 3  | 3   | 3   | 24    |
|             | SFM      | 2   | 2    | 2  | 2  | 2   | 2  | 2   | 2   | 16    |
| Subject 5   | Proposed | 3   | 3    | 2  | 3  | 2   | 3  | 3   | 3   | 22    |
|             | SFM      | 2   | 2    | 2  | 1  | 2   | 3  | 2   | 2   | 16    |
| Subject 6   | Proposed | 3   | 3    | 2  | 3  | 3   | 3  | 3   | 3   | 23    |
|             | SFM      | 2   | 2    | 2  | 2  | 2   | 2  | 2   | 2   | 16    |
| Subject 7   | Proposed | 3   | 3    | 2  | 2  | 2   | 3  | 3   | 2   | 20    |
|             | SFM      | 2   | 2    | 2  | 1  | 2   | 2  | 2   | 1   | 14    |
| Subject 8   | Proposed | 3   | 3    | 3  | 2  | 3   | 2  | 3   | 3   | 22    |
|             | SFM      | 2   | 1    | 1  | 1  | 2   | 2  | 2   | 2   | 13    |
| Subject 9   | Proposed | 3   | 2    | 3  | 3  | 3   | 3  | 3   | 3   | 23    |
|             | SFM      | 3   | 1    | 2  | 1  | 2   | 2  | 2   | 2   | 15    |
| Subject 10  | Proposed | 3   | 3    | 1  | 2  | 3   | 2  | 3   | 2   | 19    |
|             | SFM      | 2   | 2    | 1  | 1  | 2   | 2  | 2   | 2   | 14    |
| Subject 11  | Proposed | 3   | 3    | 3  | 2  | 3   | 2  | 3   | 3   | 22    |
|             | SFM      | 2   | 2    | 1  | 2  | 2   | 2  | 3   | 2   | 16    |
| Subject 12  | Proposed | 3   | 3    | 3  | 2  | 3   | 2  | 3   | 2   | 21    |
|             | SFM      | 2   | 2    | 2  | 2  | 3   | 2  | 2   | 2   | 17    |
| Subject 13  | Proposed | 2   | 2    | 3  | 2  | 2   | 2  | 3   | 3   | 19    |
|             | SFM      | 2   | 2    | 2  | 2  | 2   | 2  | 3   | 2   | 17    |
| Subject 14  | Proposed | 3   | 3    | 2  | 3  | 3   | 3  | 3   | 3   | 23    |
|             | SFM      | 2   | 2    | 2  | 2  | 2   | 2  | 2   | 2   | 16    |
| Subject 15  | Proposed | 3   | 3    | 2  | 3  | 3   | 3  | 3   | 3   | 23    |
|             | SFM      | 2   | 2    | 2  | 2  | 2   | 2  | 3   | 2   | 17    |
| Subject 16  | Proposed | 3   | 3    | 3  | 3  | 3   | 3  | 3   | 3   | 24    |
|             | SFM      | 2   | 2    | 2  | 2  | 2   | 2  | 2   | 2   | 16    |
| Subject 17  | Proposed | 3   | 3    | 2  | 3  | 3   | 3  | 3   | 3   | 23    |
|             | SFM      | 2   | 2    | 3  | 2  | 2   | 2  | 2   | 2   | 17    |

Table S3: Detailed scores from Expert 3.

CNG: Cingulum, IFOF: Inferior fronto-occipital fasciculus, UF: Uncinate fasciculus, FF: Frontopontine fibers, CST: Corticospinal tract, AC: Anterior Commissure, FST: Fornix and striae terminalis, MCP: Middle Cerebellar Peduncles, total: sum of the scores for the eight tracts.

Table S4 shows the results of Wilcoxon signed-rank statistical significance tests to compare the scores assigned to the tracts generated by the proposed method and SFM.

| Tract                                          | Expert 1 | Expert 2 | Expert 3 |
|------------------------------------------------|----------|----------|----------|
| Cingulum                                       | +1       | +1       | +1       |
| Inferior fronto-occipital fasciculus           | +1       | +1       | +1       |
| Uncinate fasciculus                            | +1       | 0        | 0        |
| Frontopontine fibers                           | +1       | +1       | +1       |
| Corticospinal tract                            | 0        | +1       | +1       |
| Anterior Commissure                            | 0        | +1       | 0        |
| Fornix and striae terminalis                   | +1       | +1       | 0        |
| Middle Cerebellar Penducles                    | +1       | +1       | +1       |
| total (sum of the scores for the eight tracts) | +1       | +1       | +1       |

Table S4: Results of statistical significance tests with Wilcoxon signed-rank test to compare the scores assigned to individual tracts for the proposed method and SFM. “+1” indicates that the score received by the proposed method was significantly higher than SFM at  $p = 0.01$ . “0” indicates that the two methods were not different at  $p = 0.01$ .
